# Supplementary material
Source: MDPI journal article supplement (https://www.mdpi.com/2410-390X/7/2/15)
Supplement: s1 [file s1]

Molecular Imaging Core  
Department of Diagnostic Imaging

St. Jude Children's Research Hospital  
Memphis, TN 38105

|                                  |  |
|----------------------------------|--|
| <h1>EQUIPMENT QUALIFICATION</h1> |  |
| Asset Code                       |  |
| Asset Name                       |  |

|                             |             |                               |                               |
|-----------------------------|-------------|-------------------------------|-------------------------------|
|                             | <b>Name</b> | <b>Position</b>               | <b>Date</b>                   |
| <b>Prepared By</b>          |             |                               |                               |
| <b>Approved By</b>          |             |                               |                               |
| <b>Executed By</b>          |             |                               |                               |
| <b>QUALIFICATION RESULT</b> |             | <input type="checkbox"/> Pass | <input type="checkbox"/> Fail |
| <b>Comments</b>             |             |                               |                               |
|                             |             |                               |                               |

This Page Intentionally Left Blank

---

## 1. SCOPE

The following document describes and collects the results the Installation Qualification (IQ), Operational Qualification (OQ) of the Testbed for vacuum pumps in compliance with FDA. 823 Positron Emission Tomography Drugs for Compounding , Investigational , and Research Uses (2016) and FDA 21 CFR Part 211 - cGMP for finished pharmaceuticals.

## 2. PURPOSE

- Collect instrument identification data
- Verify that the instrument has been installed according to the manufacturer's specifications
- Verify the availability of user manuals and other technical documentation
- Verify that the instrument components operate as described in the user manual.

## 3. REFERENCES

FDA. 823 Positron Emission Tomography Drugs for Compounding , Investigational , and Research Uses (2016).

FDA 21 CFR Part 211 - cGMP for finished pharmaceuticals.

---

## 4. INSTALLATION QUALIFICATION TESTS

### 4.1. Identification

| Parameter     | Result |
|---------------|--------|
| Asset number  |        |
| Name          |        |
| Serial number |        |

### 4.2. Location

| Parameter         | Result |
|-------------------|--------|
| Physical location |        |

### 4.3. Instrument Documentation

| Parameter                                          | Acceptance criteria | Result                       |                             |
|----------------------------------------------------|---------------------|------------------------------|-----------------------------|
| User manual available                              | Yes                 | <input type="checkbox"/> Yes | <input type="checkbox"/> No |
| Parts list available                               | Yes                 | <input type="checkbox"/> Yes | <input type="checkbox"/> No |
| Copy of firmware available                         | Yes                 | <input type="checkbox"/> Yes | <input type="checkbox"/> No |
| Maintenance plan available                         | Yes                 | <input type="checkbox"/> Yes | <input type="checkbox"/> No |
| Pressure sensor calibration certificate available  | Yes                 | <input type="checkbox"/> Yes | <input type="checkbox"/> No |
| Pressure sensor calibration certificate expiration |                     |                              |                             |
| Control software version                           |                     |                              |                             |
| Logger software version                            |                     |                              |                             |

---

**4.4.Fluidic Connections**

| Parameter    | Acceptance Criteria                                           | Result                        |                               |
|--------------|---------------------------------------------------------------|-------------------------------|-------------------------------|
| Inert gas    | Connected to suitable gas, such as nitrogen, argon, or helium | <input type="checkbox"/> Pass | <input type="checkbox"/> Fail |
| Liquid waste | Connected to collection container                             | <input type="checkbox"/> Pass | <input type="checkbox"/> Fail |
| Gas waste    | Connected to collection container                             | <input type="checkbox"/> Pass | <input type="checkbox"/> Fail |

**4.5.Electrical Connections**

| Parameter                       | Acceptance Criteria              | Result                        |                               |
|---------------------------------|----------------------------------|-------------------------------|-------------------------------|
| Electrical power supply         | Connected to wall receptacle     | <input type="checkbox"/> Pass | <input type="checkbox"/> Fail |
| Internal electrical connections | Connected as described in manual | <input type="checkbox"/> Pass | <input type="checkbox"/> Fail |

---

## 5. OPERATION QUALIFICATION TESTS

### 5.1. Testbed

#### 5.1.1. Start-up

Prepare the Testbed for use as outlined in section 5.1. of the Testbed User Manual.

| Parameter                                                            | Acceptance Criteria                                | Result                        |                               |
|----------------------------------------------------------------------|----------------------------------------------------|-------------------------------|-------------------------------|
| Connect the inert gas supply line to the Testbed's GAS IN port       | The green light in the power entry module turns on | <input type="checkbox"/> Pass | <input type="checkbox"/> Fail |
| Plug it in to the electrical outlet.                                 | LCD shows a welcome message                        | <input type="checkbox"/> Pass | <input type="checkbox"/> Fail |
| Toggle the power switch in the power entry module to the ON position | All valves remain closed                           | <input type="checkbox"/> Pass | <input type="checkbox"/> Fail |

### 5.1.2. System suitability test

Follow the steps in section 5.2 of the Testbed User Manual to prepare the unit for a system suitability test.

| Parameter                                                  | Acceptance Criteria                                       | Result                        |                               |
|------------------------------------------------------------|-----------------------------------------------------------|-------------------------------|-------------------------------|
| Press PRESSURIZE                                           | The green ring on the PRESSURIZE button illuminates       | <input type="checkbox"/> Pass | <input type="checkbox"/> Fail |
|                                                            | The LCD shows that the current mode is PRESSURIZE         | <input type="checkbox"/> Pass | <input type="checkbox"/> Fail |
|                                                            | Valve S15 opens                                           | <input type="checkbox"/> Pass | <input type="checkbox"/> Fail |
|                                                            | Valve S16 opens                                           | <input type="checkbox"/> Pass | <input type="checkbox"/> Fail |
| Record pressure reading                                    | Stable above 205 kPa.<br>Pressure: _____ kPa              | <input type="checkbox"/> Pass | <input type="checkbox"/> Fail |
| Press HOLD<br><br>Record the pressure drop after 3 minutes | Pressure drop is below 3 kPa.<br>Pressure drop: _____ kPa | <input type="checkbox"/> Pass | <input type="checkbox"/> Fail |

### 5.1.3. Exhaust selection

1. Connect the lines labeled TO INTAKE and FROM EXHAUST together using a female push-in coupling fitting.
2. Verify that the exhaust selection toggle switch is in the GAS WASTE position.

| Parameter                                                                                     | Acceptance Criteria                                               | Result                        |                               |
|-----------------------------------------------------------------------------------------------|-------------------------------------------------------------------|-------------------------------|-------------------------------|
| Press VACUUM                                                                                  | Valve S14-G opens                                                 | <input type="checkbox"/> Pass | <input type="checkbox"/> Fail |
|                                                                                               | Valve S14-L remains closed                                        | <input type="checkbox"/> Pass | <input type="checkbox"/> Fail |
|                                                                                               | Gas comes out of the GAS WASTE port on the rear of the Testbed    | <input type="checkbox"/> Pass | <input type="checkbox"/> Fail |
| Push the paddle of the exhaust selection toggle switch from the GAS WASTE to the LIQUID WASTE | The paddle on the toggle switch illuminates                       | <input type="checkbox"/> Pass | <input type="checkbox"/> Fail |
|                                                                                               | Valve S14-G closes                                                | <input type="checkbox"/> Pass | <input type="checkbox"/> Fail |
|                                                                                               | Valve S14-L opens                                                 | <input type="checkbox"/> Pass | <input type="checkbox"/> Fail |
|                                                                                               | Gas comes out of the LIQUID WASTE port on the rear of the Testbed | <input type="checkbox"/> Pass | <input type="checkbox"/> Fail |



### 5.1.4. Mode: PRESSURIZE

Install a pump as described in section 5.3. of the Testbed User Manual.

| Parameter        | Acceptance Criteria                                 | Result                        |                               |
|------------------|-----------------------------------------------------|-------------------------------|-------------------------------|
| Press PRESSURIZE | The green ring on the PRESSURIZE button illuminates | <input type="checkbox"/> Pass | <input type="checkbox"/> Fail |
|                  | The LCD shows that the current mode is PRESSURIZE   | <input type="checkbox"/> Pass | <input type="checkbox"/> Fail |
|                  | Valve S15 opens                                     | <input type="checkbox"/> Pass | <input type="checkbox"/> Fail |
|                  | Valve S16 opens                                     | <input type="checkbox"/> Pass | <input type="checkbox"/> Fail |
|                  | Pump remains off                                    | <input type="checkbox"/> Pass | <input type="checkbox"/> Fail |

### 5.1.5.Mode: CYCLE

Install a pump as described in section 5.3. of the Testbed User Manual.

| Parameter                      | Acceptance Criteria                                                         | Result                        |                               |
|--------------------------------|-----------------------------------------------------------------------------|-------------------------------|-------------------------------|
| Press CYCLE                    | The green ring on the CYCLE button illuminates                              | <input type="checkbox"/> Pass | <input type="checkbox"/> Fail |
|                                | The LCD shows that the current mode is CYCLE                                | <input type="checkbox"/> Pass | <input type="checkbox"/> Fail |
|                                | The green ring on the CYCLE button illuminates                              | <input type="checkbox"/> Pass | <input type="checkbox"/> Fail |
|                                | The LCD shows that the current mode is CYCLE                                | <input type="checkbox"/> Pass | <input type="checkbox"/> Fail |
|                                | The pump turns on                                                           | <input type="checkbox"/> Pass | <input type="checkbox"/> Fail |
|                                | The LCD shows the current absolute pressure in the pump's supply line       | <input type="checkbox"/> Pass | <input type="checkbox"/> Fail |
|                                | Valve S15 remains open                                                      | <input type="checkbox"/> Pass | <input type="checkbox"/> Fail |
|                                | Valve S14-G opens sporadically to maintain 75 kPa in the pump's supply line | <input type="checkbox"/> Pass | <input type="checkbox"/> Fail |
| Toggle PUSH for 1 to 2 seconds | The paddle on the toggle switch illuminates                                 | <input type="checkbox"/> Pass | <input type="checkbox"/> Fail |
|                                | S16 Opens                                                                   | <input type="checkbox"/> Pass | <input type="checkbox"/> Fail |
|                                | Pressure increases                                                          | <input type="checkbox"/> Pass | <input type="checkbox"/> Fail |
| Release PUSH                   | The paddle returns to its original position                                 | <input type="checkbox"/> Pass | <input type="checkbox"/> Fail |
|                                | Valve S16 closes                                                            | <input type="checkbox"/> Pass | <input type="checkbox"/> Fail |

### 5.1.6.Mode: VACUUM

Install a pump as described in section 5.3. of the Testbed User Manual.

| Parameter    | Acceptance Criteria                             | Result                        |                               |
|--------------|-------------------------------------------------|-------------------------------|-------------------------------|
| Press VACUUM | The green ring on the VACUUM button illuminates | <input type="checkbox"/> Pass | <input type="checkbox"/> Fail |
|              | The LCD shows that the current mode is VACUUM   | <input type="checkbox"/> Pass | <input type="checkbox"/> Fail |
|              | Valve S14-G opens                               | <input type="checkbox"/> Pass | <input type="checkbox"/> Fail |
|              | The pump turns on                               | <input type="checkbox"/> Pass | <input type="checkbox"/> Fail |

### 5.1.7.Mode: HOLD

Install a pump as described in section 5.3. of the Testbed User Manual.

| Parameter  | Acceptance Criteria                           | Result                        |                               |
|------------|-----------------------------------------------|-------------------------------|-------------------------------|
| Press HOLD | The green ring on the HOLD button illuminates | <input type="checkbox"/> Pass | <input type="checkbox"/> Fail |
|            | The LCD shows that the current mode is HOLD   | <input type="checkbox"/> Pass | <input type="checkbox"/> Fail |
|            | All valves remain closed                      | <input type="checkbox"/> Pass | <input type="checkbox"/> Fail |
|            | The pump remains off                          | <input type="checkbox"/> Pass | <input type="checkbox"/> Fail |

**5.1.8.Mode: VENT**

| Parameter  | Acceptance Criteria                                                  | Result                        |                               |
|------------|----------------------------------------------------------------------|-------------------------------|-------------------------------|
| Press VENT | The LCD shows that the Testbed is being vented and show a countdown. | <input type="checkbox"/> Pass | <input type="checkbox"/> Fail |
|            | All valves remain closed                                             | <input type="checkbox"/> Pass | <input type="checkbox"/> Fail |
|            | The pump remains off                                                 | <input type="checkbox"/> Pass | <input type="checkbox"/> Fail |

## 5.2. Logger application

1. Prepare the Testbed for use as outlined in section 5.1. of the Testbed User Manual.
2. Install a pump as described in section 5.3. of the Testbed User Manual.
3. Open the Testbed Logger application.
4. Connect the Testbed using a USB-A to USB-B cable.

| Parameter                                                                      | Acceptance Criteria                                                                          | Result                        |                               |
|--------------------------------------------------------------------------------|----------------------------------------------------------------------------------------------|-------------------------------|-------------------------------|
| Press CONNECT                                                                  | Connection is successful                                                                     | <input type="checkbox"/> Pass | <input type="checkbox"/> Fail |
|                                                                                | Application turns to the Main Tab                                                            | <input type="checkbox"/> Pass | <input type="checkbox"/> Fail |
| Type "AAA" in the "Pump Asset Tag" data field.                                 | Text remains in the data field.                                                              | <input type="checkbox"/> Pass | <input type="checkbox"/> Fail |
| Type "111" in the "Pump Run Hours" data field.                                 | Text remains in the data field.                                                              | <input type="checkbox"/> Pass | <input type="checkbox"/> Fail |
| Verify that the "Pump being rebuilt?" slider is in the "Before" position.      | N/A                                                                                          | N/A                           | N/A                           |
| Purge the pump as described in section 5.4 of the Testbed User Manual          | Pressure reading appears on the Chart Panel                                                  | <input type="checkbox"/> Pass | <input type="checkbox"/> Fail |
|                                                                                | Pressure values match the reading on the Testbed's LCD                                       | <input type="checkbox"/> Pass | <input type="checkbox"/> Fail |
| Execute a vacuum test as described in section 5.5 of the Testbed User Manual   | Pressure reading appears on the Chart Panel                                                  | <input type="checkbox"/> Pass | <input type="checkbox"/> Fail |
|                                                                                | Test carries on as defined in the Settings Tab                                               | <input type="checkbox"/> Pass | <input type="checkbox"/> Fail |
|                                                                                | At the end of the test, the vacuum test status checkbox changes from "Pending" to "Complete" | <input type="checkbox"/> Pass | <input type="checkbox"/> Fail |
| Execute a pressure test as described in section 5.6 of the Testbed User Manual | Pressure reading appears on the Chart Panel                                                  | <input type="checkbox"/> Pass | <input type="checkbox"/> Fail |
|                                                                                | Test carries on as defined in the Settings Tab                                               | <input type="checkbox"/> Pass | <input type="checkbox"/> Fail |
|                                                                                | At the end of the test, the vacuum test status checkbox changes from "Pending" to "Complete" | <input type="checkbox"/> Pass | <input type="checkbox"/> Fail |
| Switch to the Results Tab                                                      | The test code is "AAA-BEFORE-YYYYMMDD-HHMM"                                                  | <input type="checkbox"/> Pass | <input type="checkbox"/> Fail |

|                                                                                                                                                       |                                                                                              |                               |                               |
|-------------------------------------------------------------------------------------------------------------------------------------------------------|----------------------------------------------------------------------------------------------|-------------------------------|-------------------------------|
|                                                                                                                                                       | The results tables are consistent with the test values                                       | <input type="checkbox"/> Pass | <input type="checkbox"/> Fail |
|                                                                                                                                                       | The results plots are consistent with the test values                                        | <input type="checkbox"/> Pass | <input type="checkbox"/> Fail |
|                                                                                                                                                       | The “Pump being rebuilt?” slider is in the “Before” position                                 | <input type="checkbox"/> Pass | <input type="checkbox"/> Fail |
|                                                                                                                                                       | The “Pump asset tag” is “AAA”                                                                | <input type="checkbox"/> Pass | <input type="checkbox"/> Fail |
|                                                                                                                                                       | The “operator” data field matches the current Windows user name.                             | <input type="checkbox"/> Pass | <input type="checkbox"/> Fail |
|                                                                                                                                                       | The “Run hours” data field shows “111”                                                       | <input type="checkbox"/> Pass | <input type="checkbox"/> Fail |
| Press Save                                                                                                                                            | The report is saved in the designated storage location.                                      | <input type="checkbox"/> Pass | <input type="checkbox"/> Fail |
| Browse to the storage location using Windows file explorer and open the test report                                                                   | The report is an accurate replica of the contents of the Results Tab                         | <input type="checkbox"/> Pass | <input type="checkbox"/> Fail |
| Return to the Main Tab                                                                                                                                | N/A                                                                                          | N/A                           | N/A                           |
| Click on the “Pump being rebuilt?” slider                                                                                                             | The slider changes to the “After” position                                                   | <input type="checkbox"/> Pass | <input type="checkbox"/> Fail |
| Execute a vacuum test as described in section 5.5 of the Testbed User Manual                                                                          | Pressure reading appears on the Chart Panel                                                  | <input type="checkbox"/> Pass | <input type="checkbox"/> Fail |
|                                                                                                                                                       | Test carries on as defined in the Settings Tab                                               | <input type="checkbox"/> Pass | <input type="checkbox"/> Fail |
|                                                                                                                                                       | At the end of the test, the vacuum test status checkbox changes from “Pending” to “Complete” | <input type="checkbox"/> Pass | <input type="checkbox"/> Fail |
| Execute a pressure test as describe in section 5.6 of the Testbed User Manual<br>The vacuum test status checkbox changes from “Pending” to “Complete” | Pressure reading appears on the Chart Panel                                                  | <input type="checkbox"/> Pass | <input type="checkbox"/> Fail |
|                                                                                                                                                       | Test carries on as defined in the Settings Tab                                               | <input type="checkbox"/> Pass | <input type="checkbox"/> Fail |
|                                                                                                                                                       | At the end of the test, the vacuum test status checkbox changes from “Pending” to “Complete” | <input type="checkbox"/> Pass | <input type="checkbox"/> Fail |
| Switch to the Results Tab                                                                                                                             | The test code is “AAA-AFTER-YYMMMDH-HHMM”                                                    | <input type="checkbox"/> Pass | <input type="checkbox"/> Fail |

|                                                                                     |                                                                      |                               |                               |
|-------------------------------------------------------------------------------------|----------------------------------------------------------------------|-------------------------------|-------------------------------|
|                                                                                     | The results tables are consistent with the test values               | <input type="checkbox"/> Pass | <input type="checkbox"/> Fail |
|                                                                                     | The results plots are consistent with the test values                | <input type="checkbox"/> Pass | <input type="checkbox"/> Fail |
|                                                                                     | The “Pump being rebuilt?” slider is in the “After” position          | <input type="checkbox"/> Pass | <input type="checkbox"/> Fail |
|                                                                                     | The “Pump asset tag” is “AAA”                                        | <input type="checkbox"/> Pass | <input type="checkbox"/> Fail |
|                                                                                     | The “operator” data field matches the current Windows user name.     | <input type="checkbox"/> Pass | <input type="checkbox"/> Fail |
|                                                                                     | The “Run hours” data field shows “111”                               | <input type="checkbox"/> Pass | <input type="checkbox"/> Fail |
| Press Save                                                                          | The report is saved in the designated storage location.              | <input type="checkbox"/> Pass | <input type="checkbox"/> Fail |
| Browse to the storage location using Windows file explorer and open the test report | The report is an accurate replica of the contents of the Results Tab | <input type="checkbox"/> Pass | <input type="checkbox"/> Fail |
