# Supplementary material
Source: MDPI journal article supplement (https://www.mdpi.com/2410-390X/7/2/15)
Supplement: s1 [file s1]

## 1. Improvements to fluidic connections

Frequently detected failure modes of the pump were related to the fluidic connections. The N84 is a dual head pump, meaning that fluids are pump into the intake head, then transferred to the exhaust head, and eventually ejected.

The pumps arrived from KNF fitted with incompatible threads, as shown in **Figure S1** and S2. To preserve tightness despite the use of mismatched threads, KNF applies a sealant liquid that seals the gaps once it dries. Leaks due to degradation this sealant were detected in units in service as well in never used spare pumps. An additional point of failure is caused by using a male to female NPT extension to clear the pump body and bridge the offset between the heads.

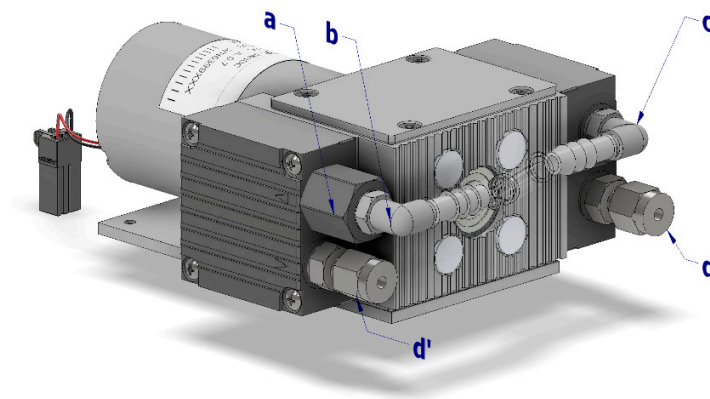

**Figure S1:** Pump as delivered from suppliers. (a) generic straight thread adapter male 1/8" NPT to female G 1/8" (BSPP), (b) elbow 6mm barbed to male R 1/8" (BSPT), Norma P/N 0730 8910 006, (c) 6mm barbed to male 1/8" NPT, Norma P/N 0730 8917 006, (d)&(d') are added by IBA with PTFE sealant tape, compression tube fitting 1/8" to male 1/8" NPT, Swagelok SS-200-1.

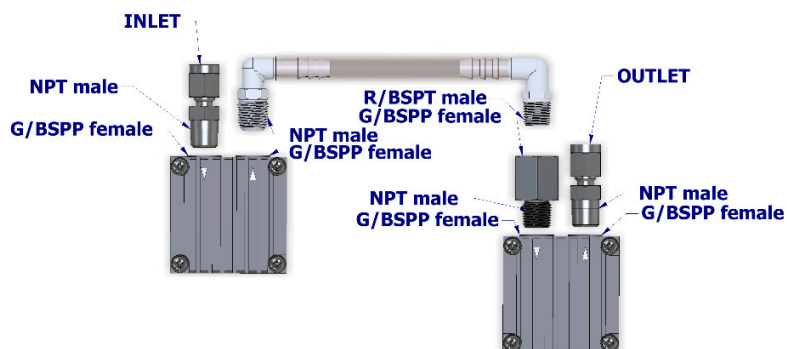

**Figure S2:** Exploded display using the supplied, incompatible fittings.

Whenever pumps are received or rebuilt, the fittings connecting both heads are replaced with fittings matching the threads of the holes as shown in Figures S3 and S4. The extension normally used on the intake

head was deemed unnecessary by using an extended type (Legris 3129 06 10) The exhaust fitting was the standard variant. (Legris 3129 06 10). The tube connecting both heads was also replaced with one with a larger internal diameter (ATP PU06MA-CB).

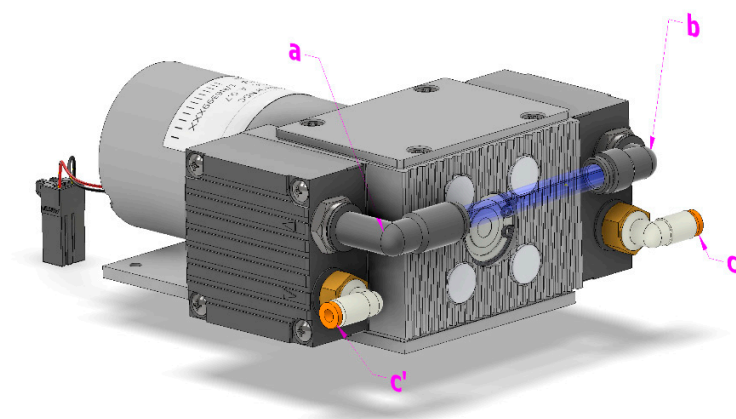

**Figure S3:** Model of a KNF KNDC85.3 pump featuring upgraded fittings: (a) push-in extended swiveling elbow, 6mm tube OD to 1/8 BSPP, Parker-Legris 3169 06 10, (b) push-in swiveling elbow, 6mm tube OD to 1/8 BSPP, Parker-Legris 3199 06 10 52, (c)&(c') push-in elbow, 1/8" tube OD to 1/8" BSP or NPT, SMC Pneumatics KQ2L01-U01A.

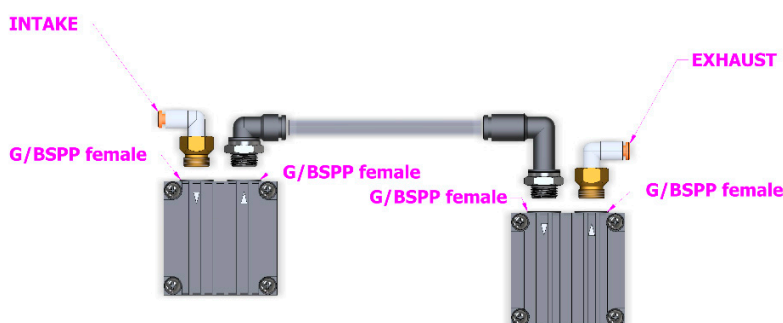

**Figure S1:** Exploded display using fittings with compatible threads.

The pumps purchased from IBA were also fitted with NPT fittings and sealant connecting its heads but added stainless steel 1/8" NPT to 1/8" Swagelok tube adapters. In this case the thread incompatibility was circumvented with the use of PTFE tape. This combination was difficult to install. Over tightening caused cracks on the pump head plate and the stainless-steel ferrule cut through the 1/8" OD plastic tubing. Intake and exhaust fittings were replaced with 1/8" push-in to 1/8" BSP or NPT elbows (SMC KQ2L01-U01A).

## 2. Enhanced pump purge procedure

KNF recommends flushing the pump with air or inert gas at atmospheric pressure for five minutes after each use to remove condensation.<sup>(3)</sup> However, we found this method inefficient and implemented our own, that we named Superpurge.

An ideal pressure chart of a Superpurge is shown in **Figure S4**. It starts by establishing a pressure setpoint of 75 kPa maintaining at setpoint constant pumping of dry gas while the pump runs. Five minutes later, the setpoint briefly changes to 150 kPa four times to force liquids out of the pump. Next, once the module is pressurized to a pressure between 205 and 220 kPa, inert gas supply is interrupted, and a tightness test takes place for 10 seconds.

We wrote two versions of the script: one to be used with a bypass tube connecting the inert gas and vacuum LUER connectors on the front of the Synthera®, and another one to be used immediately after a synthesis without having to open the hotcell, with the Integrated Fluidic Processor (IFP™, i.e. radiochemistry cassette) still in place.

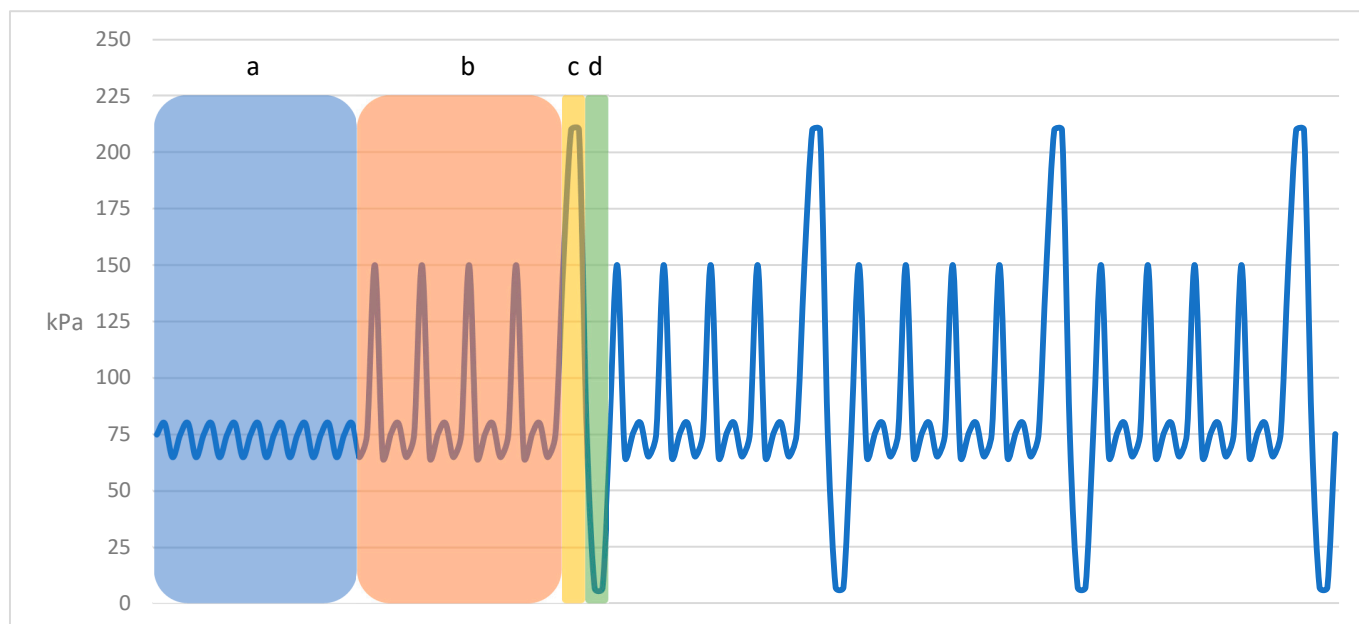

**Figure S4:** Ideal Superpurge pressure chart. **(a)** Five-minute purge at 75 kPa, **(b)** four short bursts to eject condensate, **(c)** pressure test at 220 kPa , **(d)** vacuum test at 7 to 4 kPa.

### 3. Reducing Mean Time To Repair (MTTR)

Several modifications were introduced with the goal of shortening the length of time required to remove a defective pump and install a replacement unit. Shorter repair times reduce Synthera® down-time and radiation exposure to the maintenance staff. The following modifications make it possible to exchange the module's vacuum pump without tools.

#### *Shell Removal*

Accessing the pump requires removing an external shell held in place by eight Phillips head screws on both sides of the module. These screws are hard to reach if the hotcell is crowded with other instruments, requiring the use of stubby screwdrivers, or ratcheting tools. To ease and speed up repairs, stock fasteners were replaced as shown in **Error! Reference source not found.** Low profile knurled-head thumb screws (McMaster-Carr, 92545A143) and nylon washers (McMaster-Carr, 91755A21). Washers help center the screws in the countersink through the hole of the external shell and protect its paint finish. The washers are self-retaining, meaning that three small prongs keep it conveniently attached to the screw.

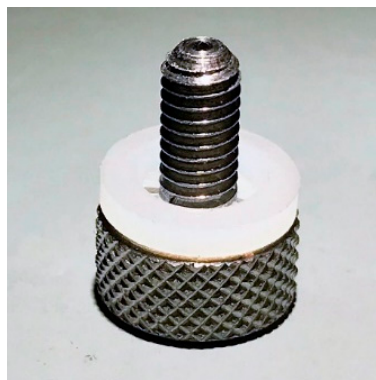

(a)

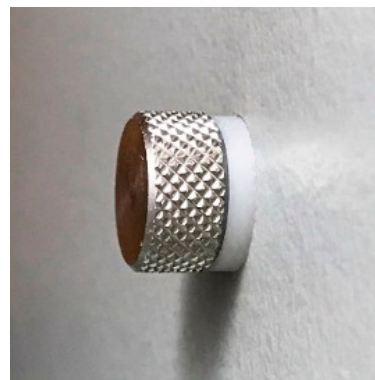

(b)

**Figure S5:** Example of the fastener modification. (a) thumbscrew and nylon self-retaining washer. (b) Assembled fastener with the nylon washer protecting the paint.

#### *Pump Removal Improvements*

The four socket head screws and vibration dampening grommets securing the pump to the base of Synthera® and grommets were also upgraded. The pump was originally attached with socket head screws going through vibration dampers measuring 5.30 mm in height (Keystone 772). This configuration was upgraded by replacing the socket head with knurled-head captive thumb screws, springs and retaining rings (McMaster-Carr 95536A357, 94125K472, and 91065A810, respectively). Vibration dampening grommets were replaced with thicker ones, measuring 7.11 mm in height (McMaster, 9311K64). On top of reducing the pump replacement time and radioactive exposure of service personnel, Synthera® users welcomed the noise reduction, which has the added benefit of making abnormal noises more noticeable.

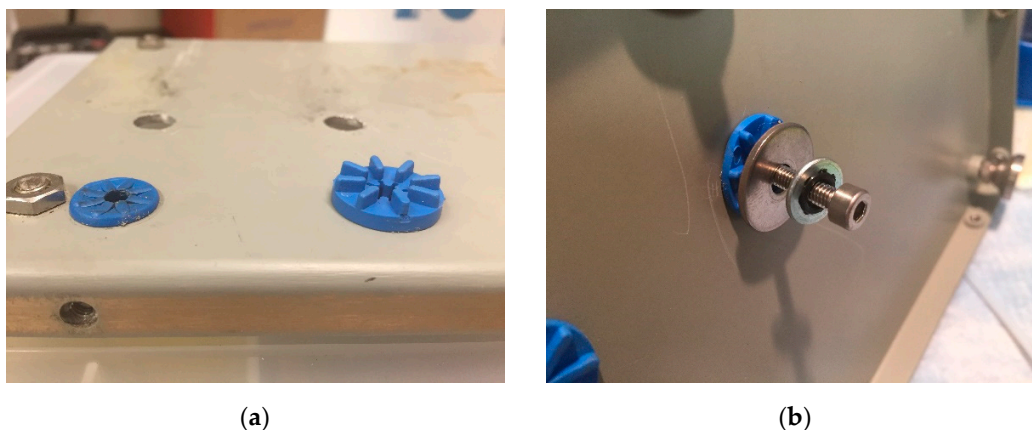

**Figure S6:** Upgraded pump fasteners. **(a)** comparison between short, worn out dampers on the left and new, thicker ones on the right. **(b)** complete assembly of a revamped pump mount.

#### 4. Tracking Mean Time Between Failure (MTBF)

An inductive hour meter (EMN Company Model MT10105) was added to record how long the pumps run before they need to be replaced. The meter's probe is attached to the pump motor with adhesive tape and the readout is affixed to the back panel of Synthera® with hook-and-loop tape. A notch was cut on the rear panel to feed the cable connecting probe and readout. The running hours are recorded monthly and when the pump is replaced, and it is reset when a new pump is installed.

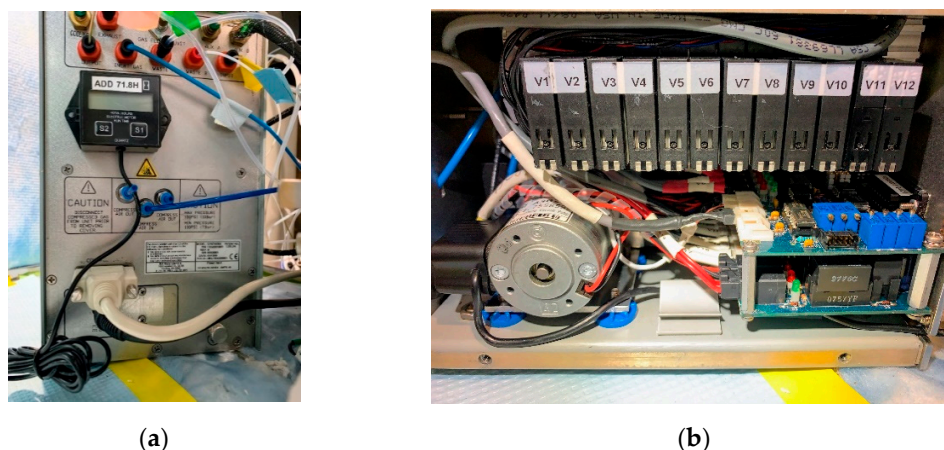

**Figure S7:** Hour meter installation. **(a)** hour meter mounted on the rear panel of a Synthera® module. **(b)** Inductive sensor mounted on the electric motor of the pump, wire routing and rear panel notch.

Since installing the hour meters, five pumps have been replaced. The average working time was 104 hours. Since our modules are used for research purposes, it is difficult to determine a service interval base of this data. However, laboratories doing routine work could use this approach to schedule pump replacement in anticipation of a drop in performance.

## 5. Bill Of Materials

| TYPE      | DESCRIPTION                                                                          | VENDOR        | PART NUMBER | QTY |
|-----------|--------------------------------------------------------------------------------------|---------------|-------------|-----|
| ENCLOSURE | 240mm Aluminum T-Slotted Framing Extrusion Rail, Single Profile, 20mm Size, Solid    | McMaster-Carr | 5537T9      | 12  |
|           | 120mm Aluminum T-Slotted Framing Extrusion Rail, Single Profile, 20mm Size, Solid    | McMaster-Carr | 5537T9      | 6   |
|           | 3-Way Corner Bracket for 20 mm High Single Rail                                      | McMaster-Carr | 5537T289    | 8   |
|           | Outside Corner Bracket for 20 mm High Single Rail                                    | McMaster-Carr | 5537T286    | 4   |
|           | Heavy Duty Hinge for 20mm High Single Profile Aluminum T-Slotted Framing Extrusion   | McMaster-Carr | 5537T859    | 2   |
|           | Swivel Leveling Mount, Nickel-Plated Steel with 2" Long 10-32 Threaded Stud          | McMaster-Carr | 6111K45     | 4   |
|           | T-slotted Silver Surface Bracket, 1-1/2" Long for 20 mm High Rail                    | McMaster-Carr | 5537T944    | 5   |
|           | 18-8 Stainless Steel Hex Drive Flat Head Screw, M4 x 0.7 mm Thread, 12 mm Long       | McMaster-Carr | 92125A192   | 9   |
|           | 18-8 Stainless Steel Cap Nut, M4 x 0.7 mm Thread                                     | McMaster-Carr | 94000A035   | 3   |
|           | Spring-Loaded Ball Fastener, M5 Thread Size for Aluminum T-Slotted Framing Extrusion | McMaster-Carr | 5537T75     | 8   |
|           | Turn-to-Open Draw Latch, Stainless Steel, Nonlocking, 3/4" Latch Distance            | McMaster-Carr | 1406A46     | 1   |
|           | Impact-Resistant Polycarbonate Sheet, 24" x 24" x 1/8"                               | McMaster-Carr | 8574K193    | 1   |
|           | Clear Impact-Resistant Polycarbonate, 12" x 12" x 1/16" Sheet                        | McMaster-Carr | 8574K24     | 1   |
|           | Tie Cable Holder for 20 mm High Single Rail T-Slotted Framing                        | McMaster-Carr | 5537T356    | 1   |
|           | Thumb-Screw-Head Captive Panel Screw, M4 x 0.7mm Thread Size, 22mm Long              | McMaster-Carr | 95536A357   | 4   |
|           | Vibration Damping Grommets, Ribbed, 0.17" Hole Diameter, 0.39" Overall Thickness     | McMaster-Carr | 9311K62     | 4   |
|           | Retainers for M4 x 0.7mm Thread Size Captive Panel Screws                            | McMaster-Carr | 91065A850   | 4   |
|           | Compression Springs, Corrosion Resistant, 9.5 mm Long                                | McMaster-Carr | 94125K472   | 4   |
|           | Spring Clip Holder for 7/8" to 1.25" Item Diameter, Nylon-Coated Steel               | McMaster-Carr | 1722A32     | 1   |
|           | Fastener Caps, Hinged, for 1/4" Thread Diameter - White                              | McMaster-Carr | 91620A300   | 2   |
|           | Gas Spring, Miniature, stroke: 3.54in, compression force: 6lbs                       | McMaster-Carr | 9417K6      | 1   |
|           | Heavy Duty 0.16" ID Eyelet Mounting Bracket for Gas Spring                           | McMaster-Carr | 9417K92     | 1   |
|           | Nylon Plastic Washer for M3 Screw Size, 3.2 mm ID, 8 mm OD, Off-White                | McMaster-Carr | 95610A130   | 4   |



|                     |                                                                                                        |                    |              |    |
|---------------------|--------------------------------------------------------------------------------------------------------|--------------------|--------------|----|
|                     | Plastic Narrow Cheese Head Slotted Screws Off-White Plastic, M3 X 0.5 mm Thread, 6 mm Long             | McMaster-Carr      | 95280A116    | 12 |
|                     | Nylon 6/6 Male-Female Threaded Hex Standoff, 4.5mm Hex, 10mm Long, M3 x 0.50 mm Thread                 | McMaster-Carr      | 95783A057    | 12 |
| FLUIDIC CONNECTIONS | Elbow 1/8" push-in to male #10-32                                                                      | Clippard Minimatic | PQ-ME04N     | 3  |
|                     | Brass Pipe Fitting with Sealant, Plug with Hex Drive, 1/8 NPT                                          | McMaster-Carr      | 50785K918    | 2  |
|                     | EV, ET, EC Series Accessories - Multi-Valve Manifold - 2 Stations                                      | Clippard Minimatic | 15481-2      | 2  |
|                     | 2-Way Normally-Closed Valves, Manifold Mount - Standard - Terminal Spades - Vac. to 105 psig+ - 24 VDC | Clippard Minimatic | ET-2M-24     | 4  |
|                     | Flow Control Valve, Meter Out from #10-32 Male Thread to 1/8" OD Tubing                                | Clippard Minimatic | PQ-CV04N     | 1  |
|                     | 30 PSI Fixed-Pressure Compressed Air Regulator, Zinc Housing 300 Maximum PSI, 1/8 NPT Female           | Parker             | 14R011FCL030 | 1  |
|                     | Mounting Bracket Kit for Parker 10F, 14F, P3AR, 14R, 14E and 15R Series Filter/Regulator               | Parker             | PS417BP      | 1  |
|                     | Push-to-Connect Tube Fitting for Air, Thru-Wall 90 Degree Elbow Connector, for 1/8" Tube OD            | McMaster-Carr      | 5779K275     | 1  |
|                     | Identification Ring for 1/8" Tube OD Push-to-Connect Tube Fitting for Air - Green                      | McMaster-Carr      | 5779K791     | 1  |
|                     | Identification Ring for 1/8" Tube OD Push-to-Connect Tube Fitting for Air - Red                        | McMaster-Carr      | 5779K791     | 1  |
|                     | Muffler, 1/8 NPT Male, Copper, 18 scfm @ 100 PSI Flow Rate                                             | McMaster-Carr      | 4450K17      | 1  |
|                     | Push-to-Connect Tube Fitting for Air, Long 90 Degree Elbow, for 1/8" Tube OD x 1/8 NPT Male            | McMaster-Carr      | 5779K148     | 2  |
|                     | Push-to-Connect Tube Fitting for Air, Thru-Wall Adapter, for 1/8" Tube OD x 1/8 NPT Female             | McMaster-Carr      | 5779K267     | 1  |
|                     | Push-to-Connect Tube Fitting for Air, Through-Wall Connector for 1/8" Tube OD                          | McMaster-Carr      | 5779K675     | 1  |
|                     | Push-to-Connect Tube Fitting for Air, Inline Tee Adapter, for 1/8" Tube OD x 1/8 NPT Female            | McMaster-Carr      | 5779K226     | 1  |
|                     | Push-to-Connect Tube Fitting for Air, Wye Connector, for 1/8" Tube OD                                  | McMaster-Carr      | 5779K41      | 1  |
|                     | Firm Polyurethane Tubing for Air and Water, 1/16" ID, 1/8" OD, Clear                                   | McMaster-Carr      | 5648K67      | 1  |
|                     | Firm Polyurethane Tubing for Air and Water, 1/16" ID, 1/8" OD, Clear Green                             | McMaster-Carr      | 5648K67      | 1  |

|                                    |                                                                                               |                 |                   |   |
|------------------------------------|-----------------------------------------------------------------------------------------------|-----------------|-------------------|---|
| ELECTRONICS AND POWER DISTRIBUTION | Power Supply Dual Voltage DC 24V/12V                                                          | CUI             | VF-D250-D1224A-CF | 1 |
|                                    | 50 psi absolute pressure range, cable connection                                              | Omega           | PX309-050A5V      | 1 |
|                                    | Arduino MEGA 2560 Rev3                                                                        | Arduino         | A000067           | 1 |
|                                    | Mega protoshield for Arduino                                                                  | Adafruit        | 192               | 1 |
|                                    | 8 Channel DC 5V Relay Module                                                                  | Sainsmart       | 20-018-102-CMS    | 1 |
|                                    | power entry module without fuse IEC320-C14                                                    | Schurter Inc.   | DC11.0031.001     | 1 |
|                                    | terminal block 4pos/2cir blue miniDIN                                                         | Phoenix Contact | 3000926           | 3 |
|                                    | miniDIN rail 15x5.5mm                                                                         | Weidmuller      | 117510000         | 1 |
|                                    | terminal block 4pos/2cir grey miniDIN                                                         | Phoenix Contact | 1414129           | 5 |
|                                    | terminal block fixed bridge 10 positions                                                      | Phoenix Contact | 3001608           | 1 |
|                                    | terminal block end cover for 4pos grey miniDIN                                                | Phoenix Contact | 3002665           | 1 |
|                                    | terminal block 2pos/1cir grey miniDIN                                                         | Phoenix Contact | 3100305           | 1 |
|                                    | Pushbutton Switch SPST-NO Anti-Vandal, Illuminated Panel Mount, Front                         | E-Switch        | PV0H240SS-331     | 5 |
|                                    | LCD i2c alphanumeric 16x2 grey on white                                                       | Matrix Orbital  | LK-162-12-GW      | 1 |
|                                    | Illuminated Toggle Switch DPDT Panel Mount - AMBER                                            | NKK switches    | TL22SDAG015D      | 1 |
|                                    | Illuminated Toggle Switch DPDT Panel Mount - AMBER                                            | NKK switches    | TL22SNAG016G      | 1 |
|                                    | USB 2.0 B Female Socket Printer Panel Mount to Right angle USB 2.0 Type-B Male Adapter Cable  | Amazon          | B01LRZ8GK2        | 1 |
|                                    | Rectangular Connectors - Housings Plug Black 0.098" (2.50mm), X-key, 3 positions, panel mount | TE Connectivity | 1-1318116-3       | 1 |
|                                    | Connector Housing, 16 positions Black 0.100" (2.54mm)                                         | TE Connectivity | 102387-3          | 1 |
|                                    | Connector Header Through Hole 16 position 0.100" (2.54mm)                                     | TE Connectivity | 5104338-3         | 1 |
