# Supplementary material
Source: MDPI journal article supplement (https://www.mdpi.com/2410-390X/7/2/15)
Supplement: s1 [file s1]

Archive with 3 entries (3 files):
- Radiosynthesizer Vacuum Pump Testbed - Qualification.pdf
- Radiosynthesizer Vacuum Pump Testbed - User Manual.pdf
- Supplementary Materials - Design and Manufacture of a Test Device for Radiosynthesizer Vacuum Pumps.pdf
